# Supplementary material
Source: PubMed Central journal article supplement (PMC3941639)
Supplement: NIHMS548853-supplement-ESI.pdf [file NIHMS548853-supplement-ESI.pdf]

# **Stimulation and release from neurons via a dual capillary collection device interfaced to mass spectrometry**

Yi Fan, Chang Young Lee, Stanislav S. Rubakhin, Jonathan V. Sweedler

Department of Chemistry and the Beckman Institute for Advanced Science and Technology,  
University of Illinois at Urbana-Champaign, Illinois 61801

## **Supporting Information Figures S1–S4**

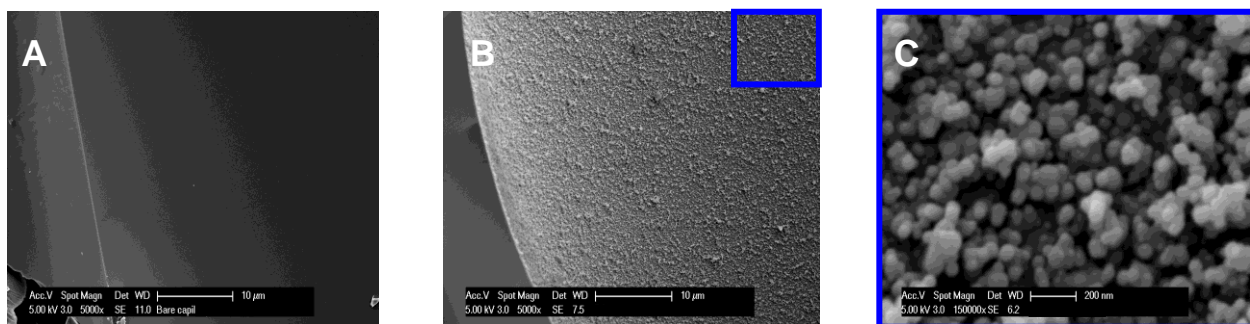

**Figure S1.** SEM images of the capillary inner wall (**A**) before and (**B**) after octadecyl modified silica nanoparticle deposition; (**C**) zoomed view of B.

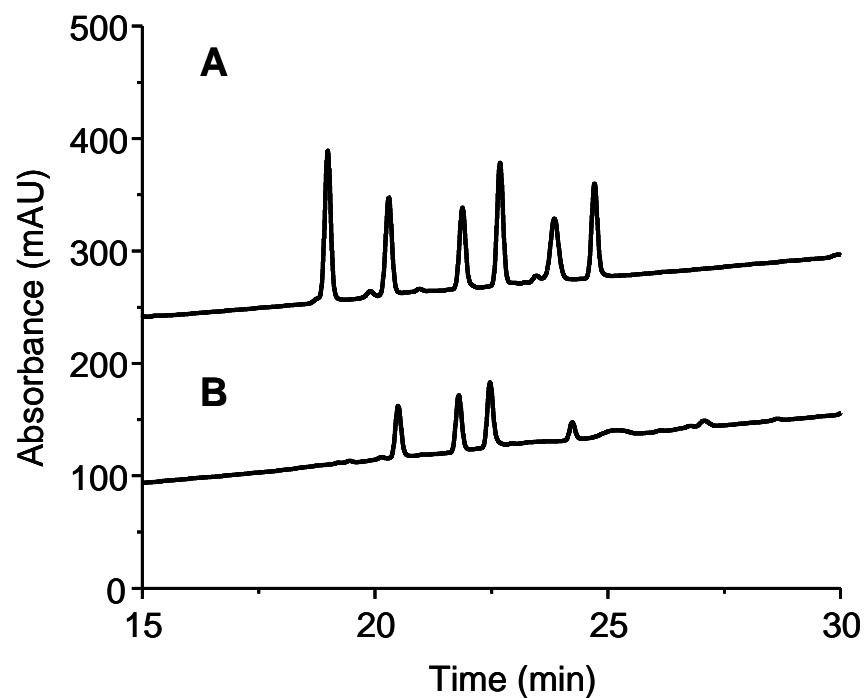

**Figure S2.** Comparison of the peptide collection efficiency from ASW using: **(A)** an OSND capillary and **(B)** an octadecyl-modified capillary without silica nanoparticles. The eluents from the columns were dried and redissolved in loading solution for CapLC-UV characterization. Peak identities (from left to right): angiotensin II, angiotensin I, substance P, bombesin, ACTH(18-39), and somatostatin.

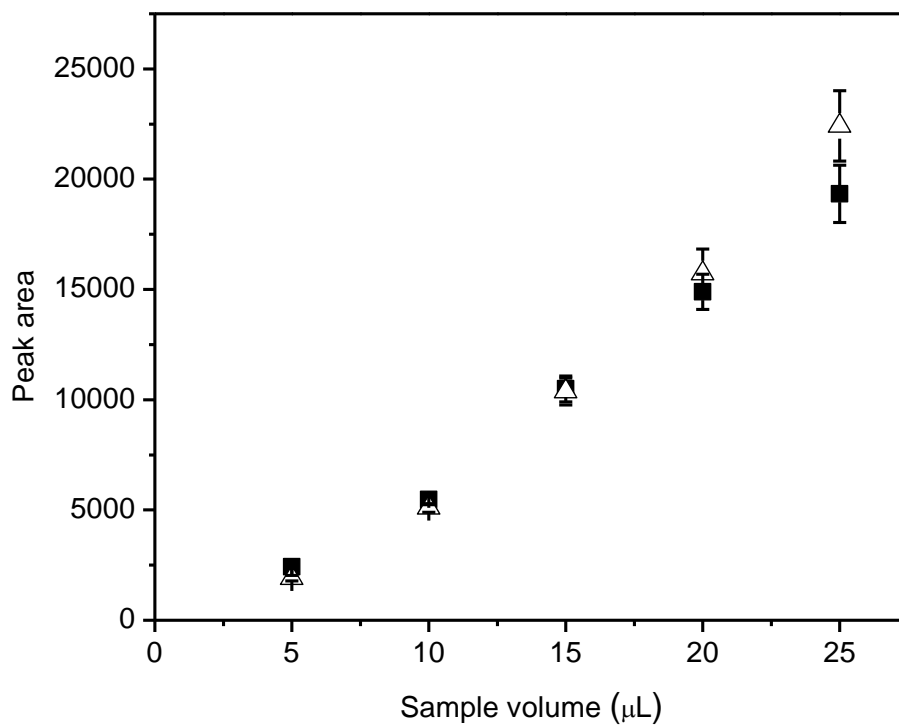

**Figure S3.** Binding curves for substance P (shown as filled squares) and bombesin (shown as empty triangles) using the OSND capillary. Substance P and bombesin were prepared in ASW at 3.0 and 2.5  $\mu\text{M}$ , respectively. Each data point represents average extraction results from three individual columns  $\pm$  standard deviation.

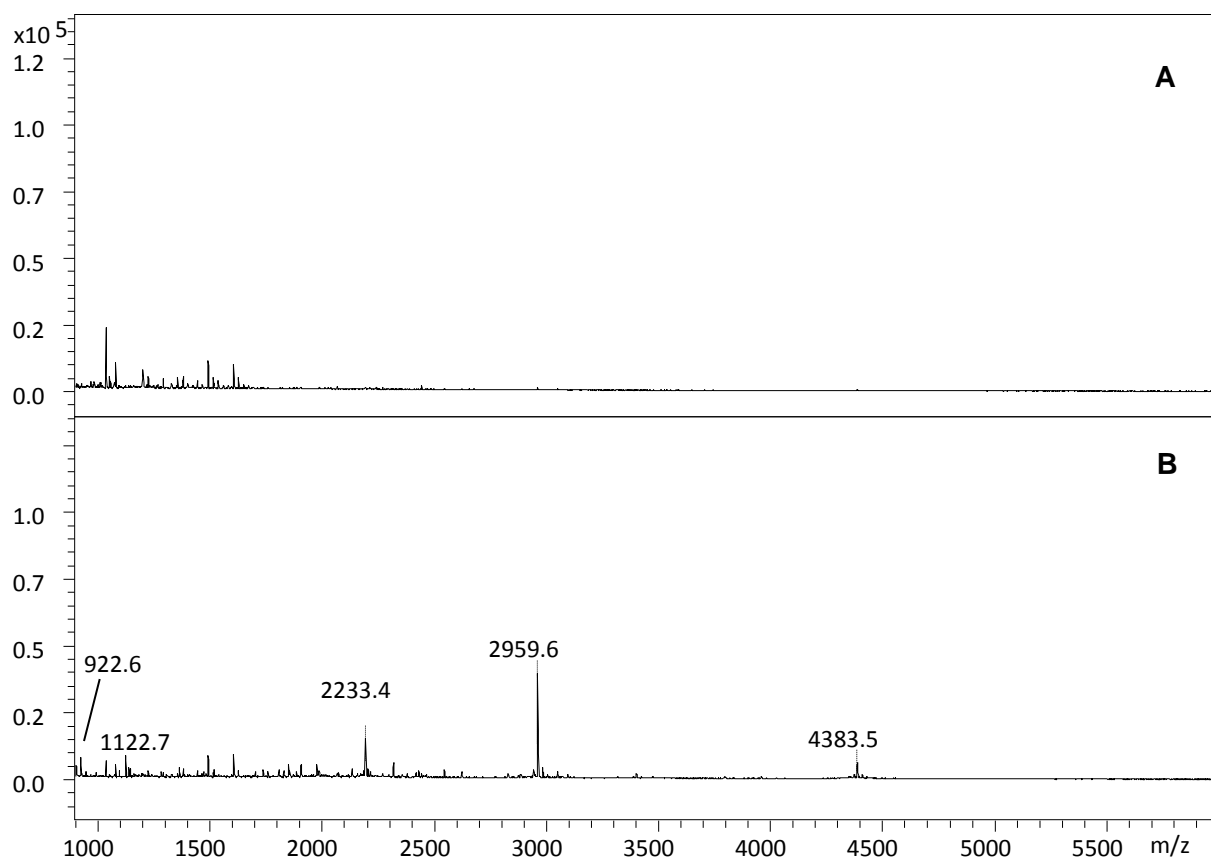

**Figure S4.** MALDI MS spectra from bag cell cluster releasates (A) pre-stimulation (showing few peaks) and (B) during/after KCl stimulation of the cluster showing  $\alpha$ -BCP(1–7) at  $m/z$  922.6,  $\alpha$ -BCP at  $m/z$  1122.7, AP(1–20) at  $m/z$  2233.4, AP at  $m/z$  2959.6, and ELH at  $m/z$  4383.5.
